# Supplementary material for: Pt incorporated mesoporous carbon spheres: controllable structure with enhanced catalytic activity and stability
Source: Royal Society of Chemistry journal article supplement (doi:10.1039/c8ra01453a), 2018-01-01
Supplement: c8ra01453a1.pdf [file c8ra01453a1.pdf]

## **Pt Incorporated Mesoporous Carbon Spheres: Controllable Structure with Enhanced Catalytic Activity and Stability**

Hongyan Liu, \* Yaling Liu, Huimei Da, Ruo Yuan

Key Laboratory of Luminescent and Real-Time Analytical Chemistry, Ministry of Education, College of Chemistry and Chemical Engineering, Southwest University, Chongqing 400715, P. R. China

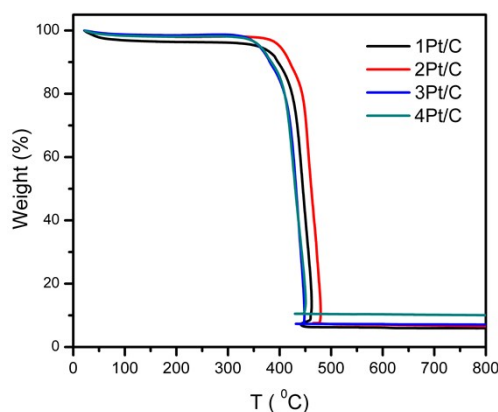

Fig. S1 TGA curves to determine Pt loading in the Pt/C composites

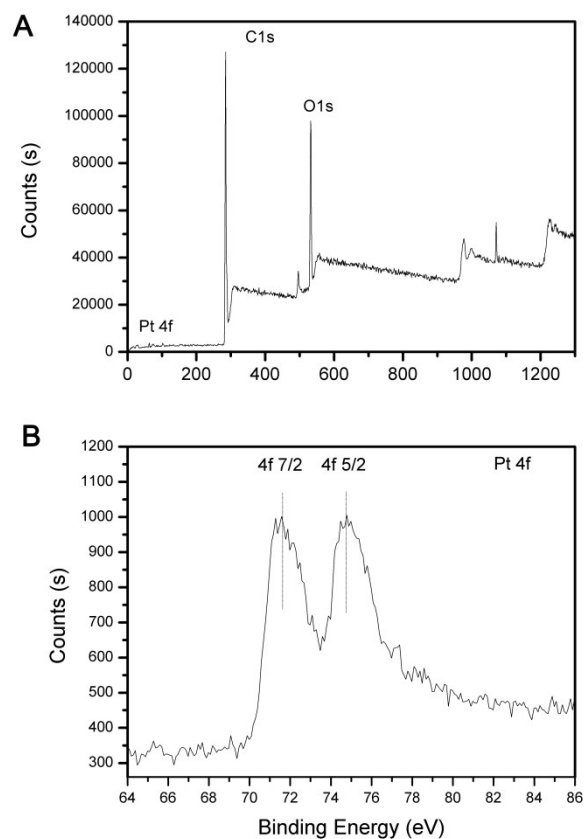

Fig. S2 XPS spectra of (A) 2Pt/C catalyst and (B) Pt 4f of 2Pt/C.

Table S1 Structural parameters for the various Pt/C composite from the N<sub>2</sub> adsorption–desorption isotherms.

| Sample | BET Surface area(m <sup>2</sup> /g) | Average pore size (nm) | Pore volume |
|--------|-------------------------------------|------------------------|-------------|
| 1Pt/C  | 401                                 | 5.5                    | 0.56        |
| 2Pt/C  | 600                                 | 4.6                    | 0.68        |
| 3Pt/C  | 550                                 | 5.0                    | 0.68        |
| 4Pt/C  | 427                                 | 5.3                    | 0.71        |
